# Supplementary material for: Characterisation of physicochemical parameters and antibacterial properties of New Caledonian honeys
Source: PubMed Central journal article supplement (PMC10617706; doi:10.1371/journal.pone.0293730), 2023-10-31
Supplement: pone.0293730.s002.pdf [file pone.0293730.s002.pdf]

**Table S1.** Qualitative pollen analysis of collected New Caledonian honey samples (n=33).

| Sample No. | Pollen Type Classes  |                                                   |                                                 |
|------------|----------------------|---------------------------------------------------|-------------------------------------------------|
|            | ≥46%                 | 45–16%                                            | 15–4%                                           |
| 1          | <i>Myrtaceae</i>     |                                                   |                                                 |
| 2          |                      | <i>Mimosaceae, Myrtaceae, Apocynaceae</i>         |                                                 |
| 3          | <i>Myrtaceae</i>     |                                                   |                                                 |
| 4          |                      | <i>Anacardiaceae, Cunoniaceae</i>                 |                                                 |
| 5          |                      | <i>Fagaceae</i>                                   | <i>Anacardiaceae</i>                            |
| 6          | <i>Myrtaceae</i>     | <i>Apiaceae</i>                                   |                                                 |
| 7          |                      | <i>Myrtaceae, Casuarinaceae, Mimosaceae</i>       |                                                 |
| 8          | <i>Myrtaceae</i>     |                                                   | <i>Cunoniaceae</i>                              |
| 9          | <i>Mimosaceae</i>    | <i>Anacardiaceae</i>                              |                                                 |
| 10         | <i>Fagaceae</i>      |                                                   |                                                 |
| 11         |                      | <i>Anacardiaceae, Myrtaceae</i>                   | <i>Mimosaceae</i>                               |
| 12         | <i>Anacardiaceae</i> | <i>Cunoniaceae</i>                                |                                                 |
| 13         | <i>Cunoniaceae</i>   | <i>Anacardiaceae</i>                              |                                                 |
| 14         |                      | <i>Anacardiaceae, Apiaceae, Cunoniaceae</i>       |                                                 |
| 15         |                      | <i>Salicaceae, Myrtaceae, Poaceae</i>             | <i>Mimosaceae</i>                               |
| 16         |                      | <i>Mimosaceae, Cunoniaceae, Myrtaceae</i>         |                                                 |
| 17         |                      | <i>Rhizophoraceae, Mimosaceae</i>                 | <i>Myrtaceae</i>                                |
| 18         | <i>Mimosaceae</i>    |                                                   |                                                 |
| 19         | <i>Anacardiaceae</i> | <i>Myrtaceae</i>                                  | <i>Cunoniaceae</i>                              |
| 20         | <i>Cunoniaceae</i>   |                                                   |                                                 |
| 21         |                      | <i>Cunoniaceae</i>                                |                                                 |
| 22         |                      | <i>Cunoniaceae</i>                                | <i>Anacardiaceae</i>                            |
| 23         |                      | <i>Anacardiaceae, Euphorbiaceae, Brassicaceae</i> |                                                 |
| 24         |                      | <i>Anacardiaceae, Euphorbiaceae</i>               |                                                 |
| 25         | <i>Anacardiaceae</i> |                                                   | <i>Cunoniaceae</i>                              |
| 26         | <i>Anacardiaceae</i> | <i>Cunoniaceae</i>                                |                                                 |
| 27         | <i>Cunoniaceae</i>   |                                                   |                                                 |
| 28         |                      | <i>Anacardiaceae, Apiaceae, Cunoniaceae</i>       | <i>Salicaceae</i>                               |
| 29         | <i>Cunoniaceae</i>   |                                                   |                                                 |
| 30         | <i>Mimosaceae</i>    | <i>Myrtaceae</i>                                  | <i>Rosaceae</i>                                 |
| 31         | <i>Apocynaceae</i>   |                                                   | <i>Zygophyllaceae, Anacardiaceae, Myrtaceae</i> |
| 32         | <i>Myrtaceae</i>     | <i>Apocynaceae</i>                                | <i>Zygophyllaceae, Anacardiaceae</i>            |
| 33         |                      | <i>Myrtaceae, Mimosaceae</i>                      | <i>Cunoniaceae</i>                              |
