# Supplementary material for: Characterisation of physicochemical parameters and antibacterial properties of New Caledonian honeys
Source: PubMed Central journal article supplement (PMC10617706; doi:10.1371/journal.pone.0293730), 2023-10-31

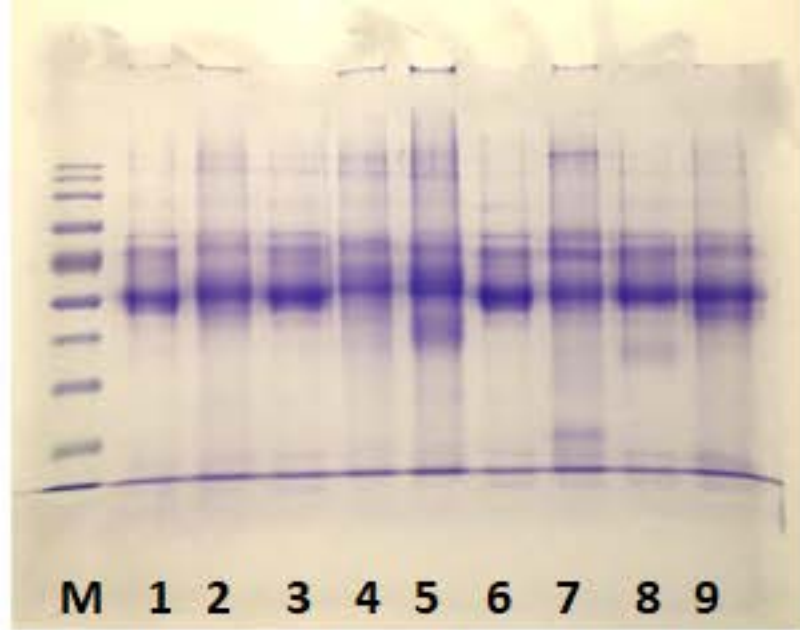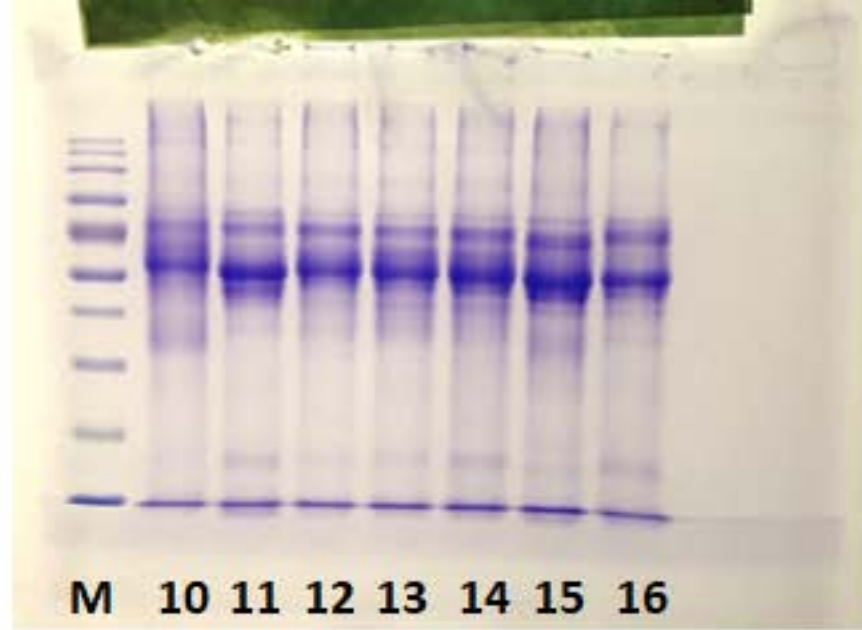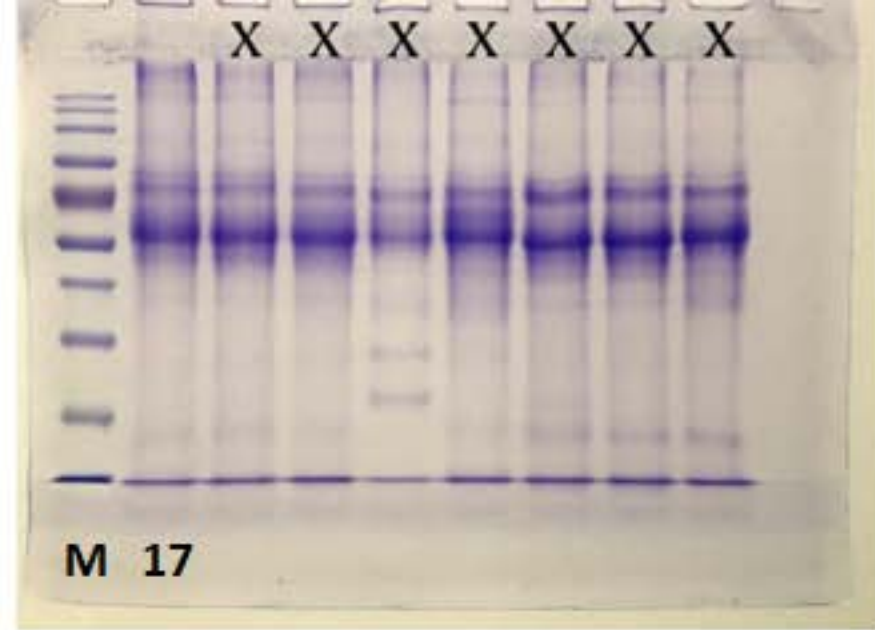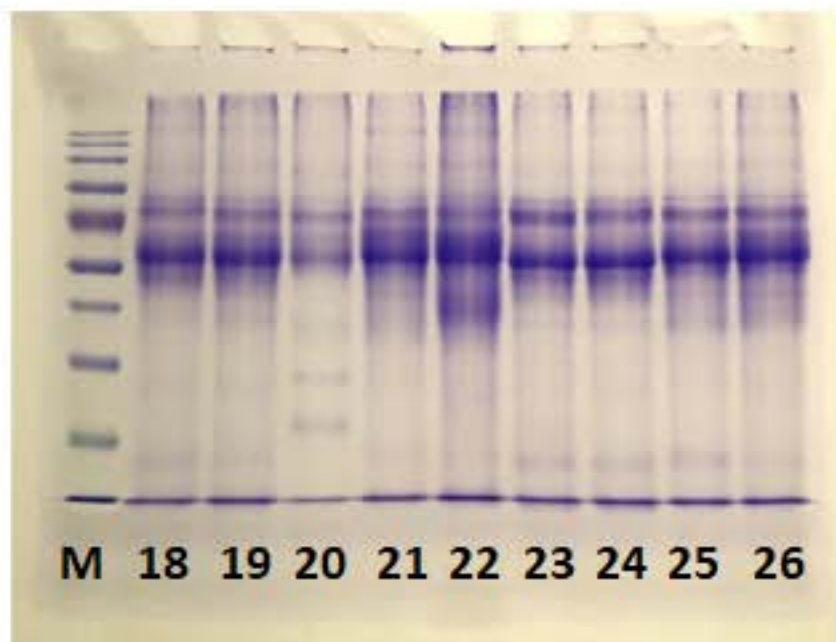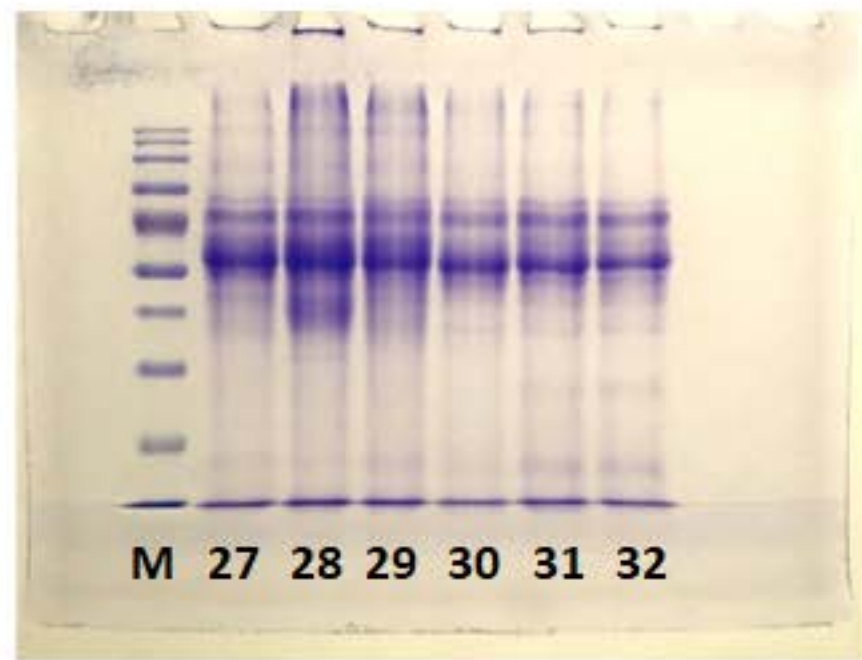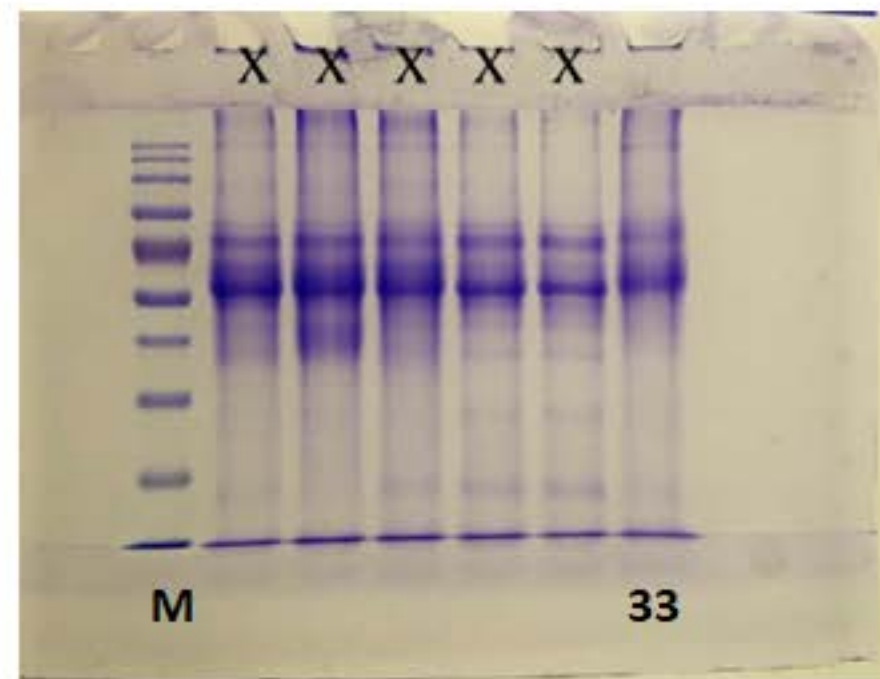

Supplement: pone.0293730.s003.pdf [file pone.0293730.s003.pdf]
